# Supplementary material for: Biomass-derived Carbon Quantum Dots for Visible-Light-Induced Photocatalysis and Label-Free Detection of Fe(III) and Ascorbic acid
Source: PubMed Central journal article supplement (PMC6803716; doi:10.1038/s41598-019-49266-y), 2019-10-21
Supplement: 41598_2019_49266_MOESM1_ESM.pdf [file 41598_2019_49266_MOESM1_ESM.pdf]

## Supplementary Information

### **Biomass-derived Carbon Quantum Dots for Visible-Light-Induced Photocatalysis and Label-Free Detection of Fe(III) and Ascorbic acid**

Gouri Sankar Das<sup>a</sup>, Jong Pil Shim<sup>b</sup>, Amit Bhatnagar<sup>c</sup>, Kumud Malika Tripathi<sup>\*a</sup>, and TaeYoung Kim<sup>\*a</sup>

<sup>a</sup> *Department of Bionanotechnology, Gachon University, 1342 Seongnam-daero, Sujeong-gu Seongnam-si, Gyeonggi-do 13120, South Korea*

<sup>b</sup> *Department of Materials Science and Engineering, Korea University, 145 Anam-ro, Seongbuk-gu, Seoul 02841, Korea*

<sup>c</sup> *Department of Environmental and Biological Sciences, University of Eastern Finland, FI-70211, Kuopio, Finland*

<sup>d</sup> *Department of Materials Science and Engineering, Gachon University, 1342 Seongnam-daero, Sujeong-gu Seongnam-si, Gyeonggi-do 13120, South Korea*

Corresponding Author: [kumud20010@gmail.com](mailto:kumud20010@gmail.com), [taeykim@gachon.ac.kr](mailto:taeykim@gachon.ac.kr)

## Chemical composition of CQDs

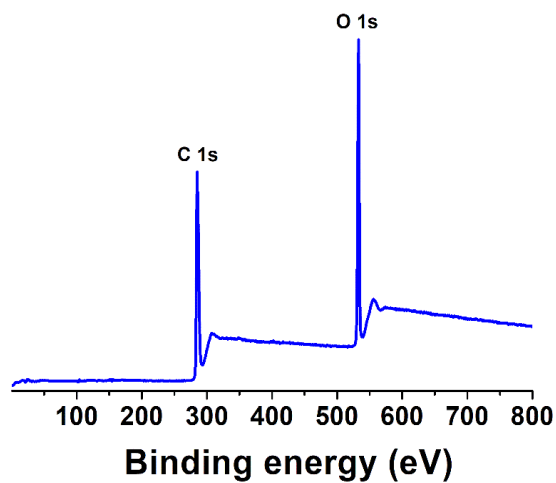

**Figure S1.** Wide-angle XPS spectrum of CQDs.

**Table S1.** EDS analysis of CQDs.

| Element | Weight% | Atomic % |
|---------|---------|----------|
| C K     | 73.22   | 78.45    |
| O K     | 26.78   | 21.55    |
| Totals  | 100.00  |          |

### Photostability of CQDs

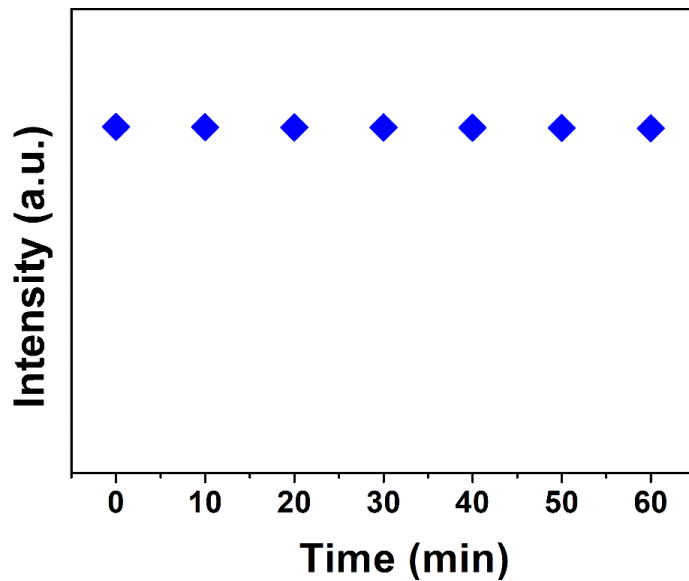

**Figure S2.** PL emission of CQDs under continuous UV (365 nm) irradiation for 60 min.

### Photocatalytic degradation of MB dye under visible-light irradiation

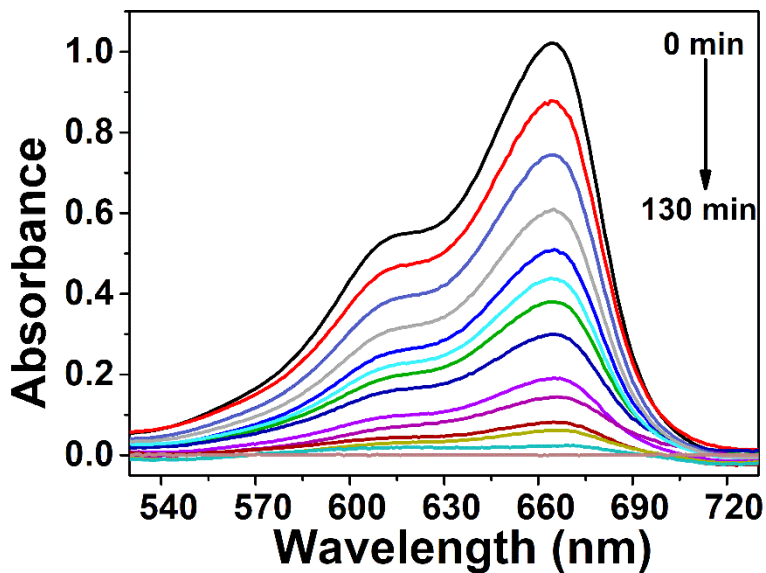

**Figure S3.** UV-vis absorption spectra of MB in presence of CQDs under visible light irradiation;
